# Supplementary material for: Ustilago maydis Metabolic Characterization and Growth Quantification with a Genome-Scale Metabolic Model
Source: MDPI journal article supplement (doi:10.3390/jof8050524), 2022-05-20
Supplement: s1 [file s1]

## PM1 MicroPlate™ Carbon Sources

|                              |                                            |                                    |                              |                         |                                                          |                                         |                                        |                                            |                            |                          |                        |
|------------------------------|--------------------------------------------|------------------------------------|------------------------------|-------------------------|----------------------------------------------------------|-----------------------------------------|----------------------------------------|--------------------------------------------|----------------------------|--------------------------|------------------------|
| A1<br>Negative Control       | A2<br>L-Arabinose                          | A3<br>N-Acetyl-D-Glucosamine       | A4<br>D-Saccharic Acid       | A5<br>Succinic Acid     | A6<br>D-Galactose                                        | A7<br>L-Aspartic Acid                   | A8<br>L-Proline                        | A9<br>D-Alanine                            | A10<br>D-Trehalose         | A11<br>D-Mannose         | A12<br>Dulcitol        |
| B1<br>D-Serine               | B2<br>D-Sorbitol                           | B3<br>Glycerol                     | B4<br>L-Fucose               | B5<br>D-Glucuronic Acid | B6<br>D-Gluconic Acid                                    | B7<br>D,L- $\alpha$ -Glycerol-Phosphate | B8<br>D-Xylose                         | B9<br>L-Lactic Acid                        | B10<br>Formic Acid         | B11<br>D-Mannitol        | B12<br>L-Glutamic Acid |
| C1<br>D-Glucose-6-Phosphate  | C2<br>D-Galactonic Acid- $\gamma$ -Lactone | C3<br>D,L-Malic Acid               | C4<br>D-Ribose               | C5<br>Tween 20          | C6<br>L-Rhamnose                                         | C7<br>D-Fructose                        | C8<br>Acetic Acid                      | C9<br>$\alpha$ -D-Glucose                  | C10<br>Maltose             | C11<br>D-Melibiose       | C12<br>Thymidine       |
| D-1<br>L-Asparagine          | D2<br>D-Aspartic Acid                      | D3<br>D-Glucosaminic Acid          | D4<br>1,2-Propanediol        | D5<br>Tween 40          | D6<br>$\alpha$ -Keto-Glutaric Acid                       | D7<br>$\alpha$ -Keto-Butyric Acid       | D8<br>$\alpha$ -Methyl-D-Galactoside   | D9<br>$\alpha$ -D-Lactose                  | D10<br>Lactulose           | D11<br>Sucrose           | D12<br>Uridine         |
| E1<br>L-Glutamine            | E2<br>m-Tartaric Acid                      | E3<br>D-Glucose-1-Phosphate        | E4<br>D-Fructose-6-Phosphate | E5<br>Tween 80          | E6<br>$\alpha$ -Hydroxy Glutaric Acid- $\gamma$ -Lactone | E7<br>$\alpha$ -Hydroxy Butyric Acid    | E8<br>$\beta$ -Methyl-D-Glucoside      | E9<br>Adonitol                             | E10<br>Maltotriose         | E11<br>2-Deoxy Adenosine | E12<br>Adenosine       |
| F1<br>Glycyl-L-Aspartic Acid | F2<br>Citric Acid                          | F3<br>myo-Inositol                 | F4<br>D-Threonine            | F5<br>Fumaric Acid      | F6<br>Bromo Succinic Acid                                | F7<br>Propionic Acid                    | F8<br>Mucic Acid                       | F9<br>Glycolic Acid                        | F10<br>Glyoxylic Acid      | F11<br>D-Cellobiose      | F12<br>Inosine         |
| G1<br>Glycyl-L-Glutamic Acid | G2<br>Tricarballic Acid                    | G3<br>L-Serine                     | G4<br>L-Threonine            | G5<br>L-Alanine         | G6<br>L-Alanyl-Glycine                                   | G7<br>Acetoacetic Acid                  | G8<br>N-Acetyl- $\beta$ -D-Mannosamine | G9<br>Mono Methyl Succinate                | G10<br>Methyl Pyruvate     | G11<br>D-Malic Acid      | G12<br>L-Malic Acid    |
| H1<br>Glycyl-L-Proline       | H2<br>p-Hydroxy Phenyl Acetic Acid         | H3<br>m-Hydroxy Phenyl Acetic Acid | H4<br>Tyramine               | H5<br>D-Psicose         | H6<br>L-Lyxose                                           | H7<br>Glucuronamide                     | H8<br>Pyruvic Acid                     | H9<br>L-Galactonic Acid- $\gamma$ -Lactone | H10<br>D-Galacturonic Acid | H11<br>Phenylethyl-amine | H12<br>2-Aminoethanol  |

## PM2A MicroPlate™ Carbon Sources

|                                  |                                |                                |                             |                              |                                    |                                     |                                     |                                         |                                     |                                     |                                                     |
|----------------------------------|--------------------------------|--------------------------------|-----------------------------|------------------------------|------------------------------------|-------------------------------------|-------------------------------------|-----------------------------------------|-------------------------------------|-------------------------------------|-----------------------------------------------------|
| A1<br>Negative Control           | A2<br>Chondroitin Sulfate C    | A3<br>$\alpha$ -Cyclodextrin   | A4<br>$\beta$ -Cyclodextrin | A5<br>$\gamma$ -Cyclodextrin | A6<br>Dextrin                      | A7<br>Gelatin                       | A8<br>Glycogen                      | A9<br>Inulin                            | A10<br>Laminarin                    | A11<br>Mannan                       | A12<br>Pectin                                       |
| B1<br>N-Acetyl-D-Galactosamine   | B2<br>N-Acetyl-Neuraminic Acid | B3<br>$\beta$ -D-Allose        | B4<br>Amygdalin             | B5<br>D-Arabinose            | B6<br>D-Arabitol                   | B7<br>L-Arabitol                    | B8<br>Arbutin                       | B9<br>2-Deoxy-D-Ribose                  | B10<br>l-Erythritol                 | B11<br>D-Fucose                     | B12<br>3-O- $\beta$ -D-Galactopyranosyl-D-Arabinose |
| C1<br>Gentiobiose                | C2<br>L-Glucose                | C3<br>Lactitol                 | C4<br>D-Melezitose          | C5<br>Maltitol               | C6<br>$\alpha$ -Methyl-D-Glucoside | C7<br>$\beta$ -Methyl-D-Galactoside | C8<br>3-Methyl Glucose              | C9<br>$\beta$ -Methyl-D-Glucuronic Acid | C10<br>$\alpha$ -Methyl-D-Mannoside | C11<br>$\beta$ -Methyl-D-Xyloside   | C12<br>Palatinose                                   |
| D1<br>D-Raffinose                | D2<br>Salicin                  | D3<br>Sedoheptulosan           | D4<br>L-Sorbose             | D5<br>Stachyose              | D6<br>D-Tagatose                   | D7<br>Turanose                      | D8<br>Xylitol                       | D9<br>N-Acetyl-D-Glucosaminitol         | D10<br>$\gamma$ -Amino Butyric Acid | D11<br>$\delta$ -Amino Valeric Acid | D12<br>Butyric Acid                                 |
| E1<br>Capric Acid                | E2<br>Caproic Acid             | E3<br>Citraconic Acid          | E4<br>Citramalic Acid       | E5<br>D-Glucosamine          | E6<br>2-Hydroxy Benzoic Acid       | E7<br>4-Hydroxy Benzoic Acid        | E8<br>$\beta$ -Hydroxy Butyric Acid | E9<br>Glycolic Acid                     | E10<br>$\alpha$ -Keto-Valeric Acid  | E11<br>Itaconic Acid                | E12<br>5-Keto-D-Gluconic Acid                       |
| F1<br>D-Lactic Acid Methyl Ester | F2<br>Malonic Acid             | F3<br>Melibionc Acid           | F4<br>Oxalic Acid           | F5<br>Oxalomalic Acid        | F6<br>Quinic Acid                  | F7<br>D-Ribono-1,4-Lactone          | F8<br>Sebacic Acid                  | F9<br>Sorbic Acid                       | F10<br>Succinamic Acid              | F11<br>D-Tartaric Acid              | F12<br>L-Tartaric Acid                              |
| G1<br>Acetamide                  | G2<br>L-Alaninamide            | G3<br>N-Acetyl-L-Glutamic Acid | G4<br>L-Arginine            | G5<br>Glycine                | G6<br>L-Histidine                  | G7<br>L-Homoserine                  | G8<br>Hydroxy-L-Proline             | G9<br>L-Isoleucine                      | G10<br>L-Leucine                    | G11<br>L-Lysine                     | G12<br>L-Methionine                                 |
| H1<br>L-Omithine                 | H2<br>L-Phenylalanine          | H3<br>L-Pyrogutamic Acid       | H4<br>L-Valine              | H5<br>D,L-Carnitine          | H6<br>Sec-Butylamine               | H7<br>D,L-Octopamine                | H8<br>Putrescine                    | H9<br>Dihydroxy Acetone                 | H10<br>2,3-Butanediol               | H11<br>2,3-Butanedione              | H12<br>3-Hydroxy-2-Butanone                         |
